# Supplementary material for: Strengthening health data on a rare and heterogeneous disease: sarcoma incidence and histological subtypes in Germany
Source: Springer Nature journal article supplement (doi:10.1186/s12889-018-5131-4), 2018-02-12

### All Sites, Men

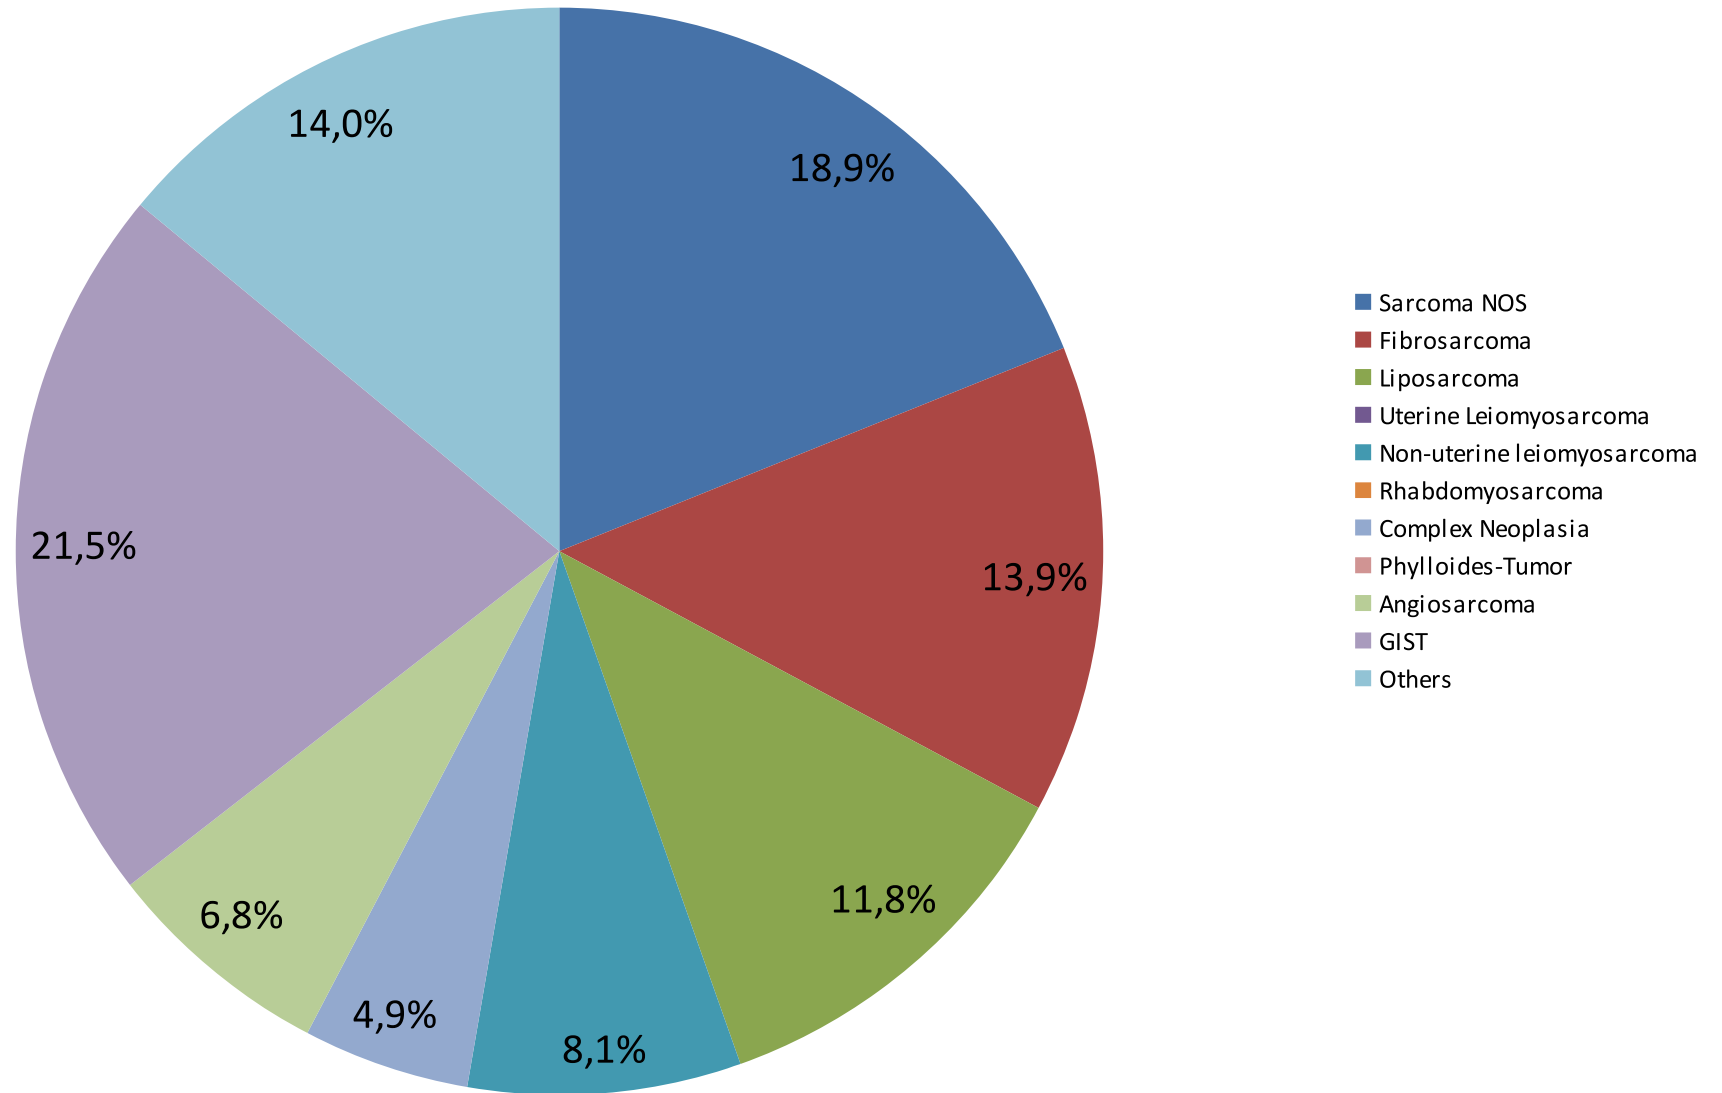

### All Sites, Women

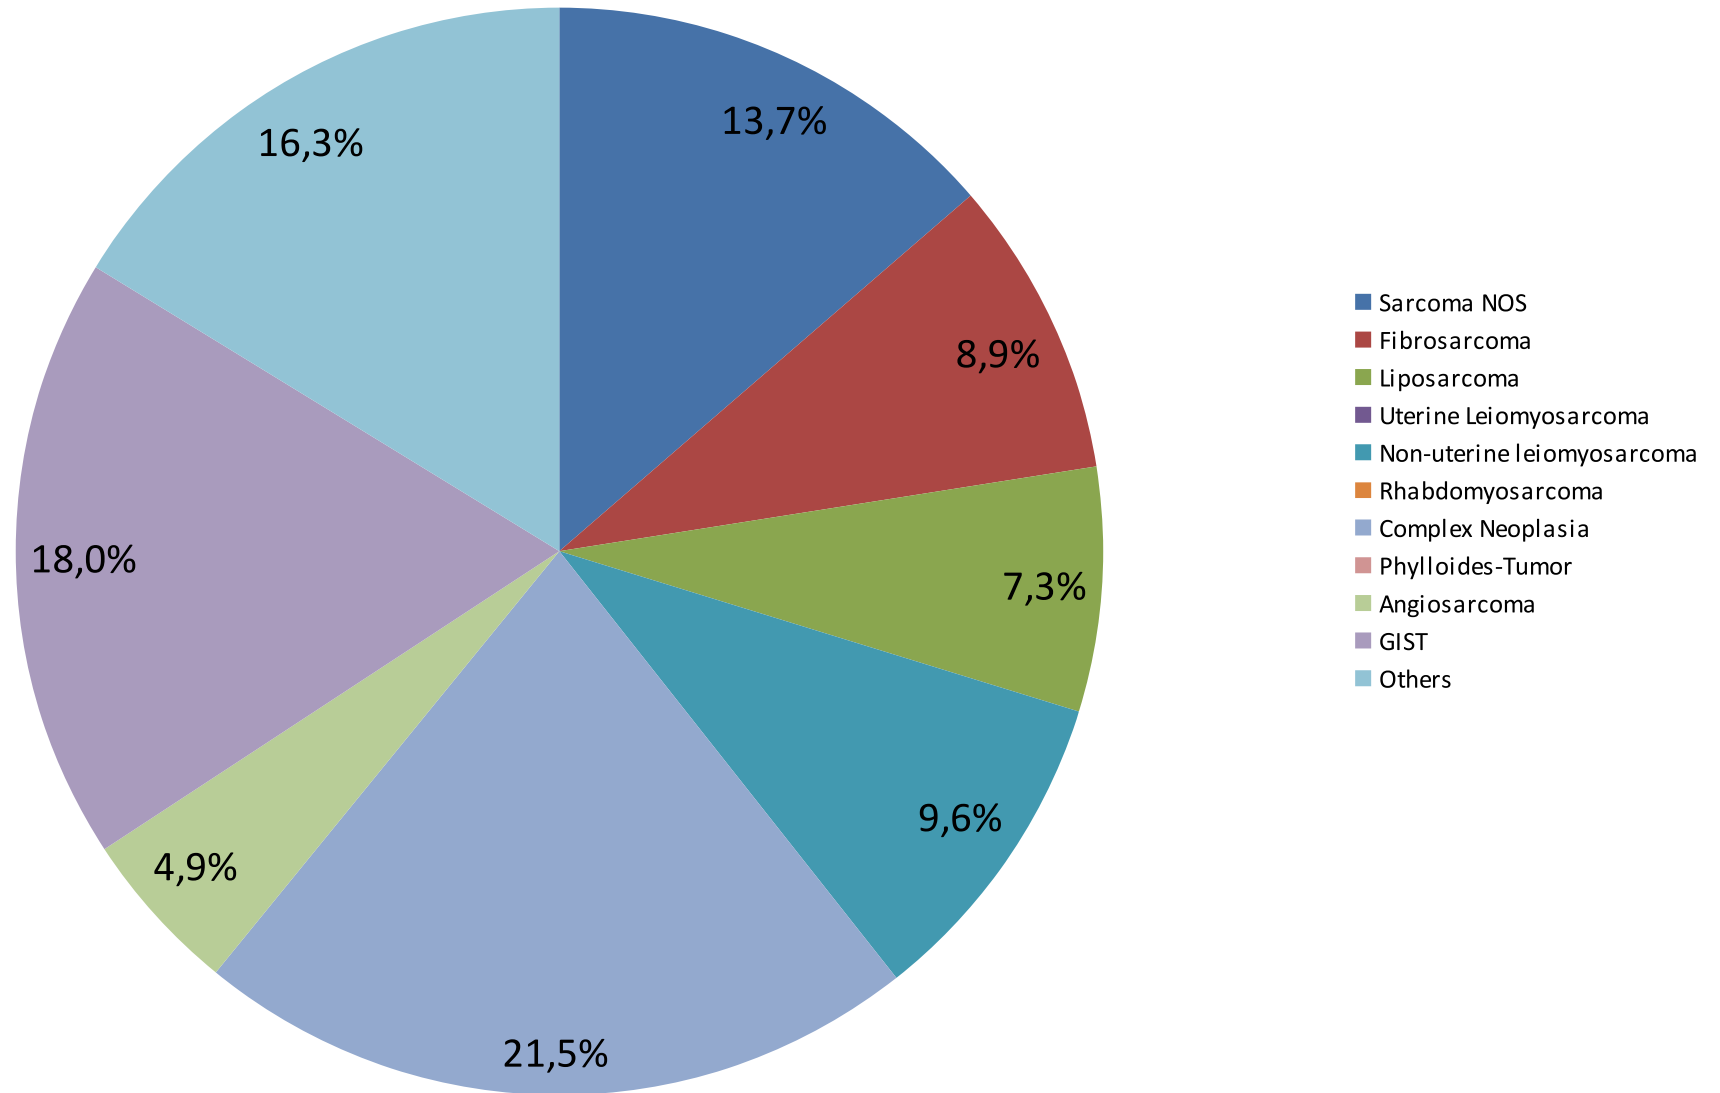

## Head and Neck, Men

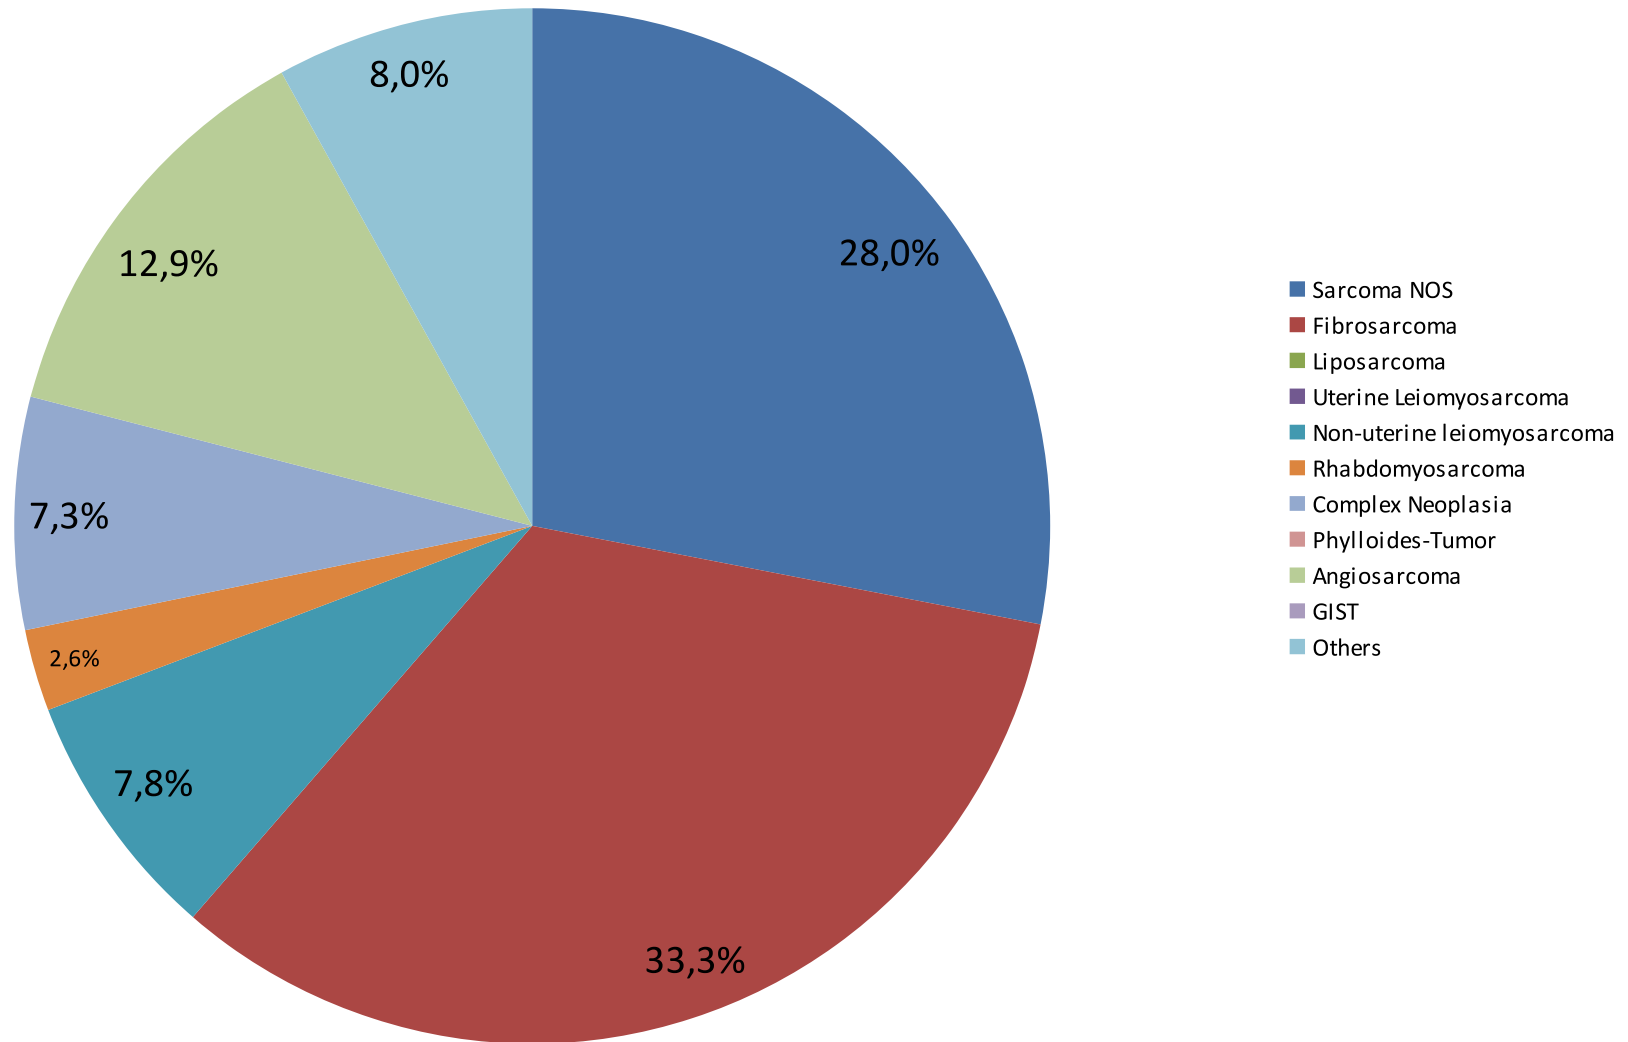

## Head and Neck, Women

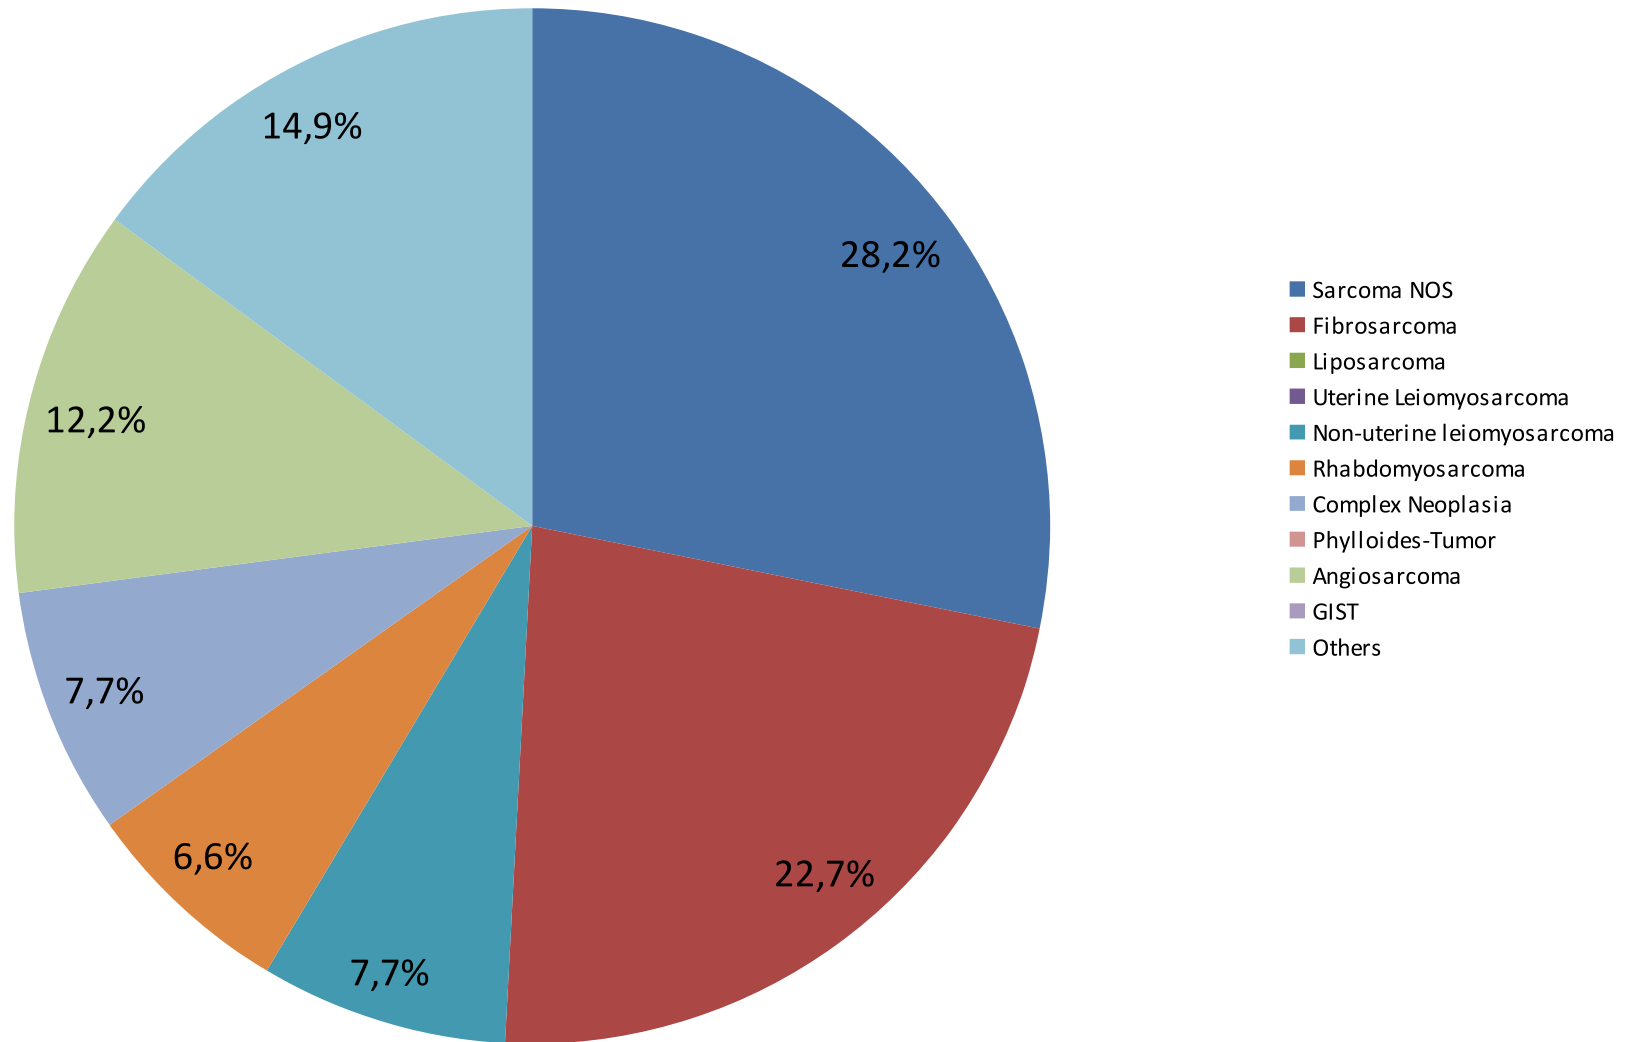

## Limbs, Men

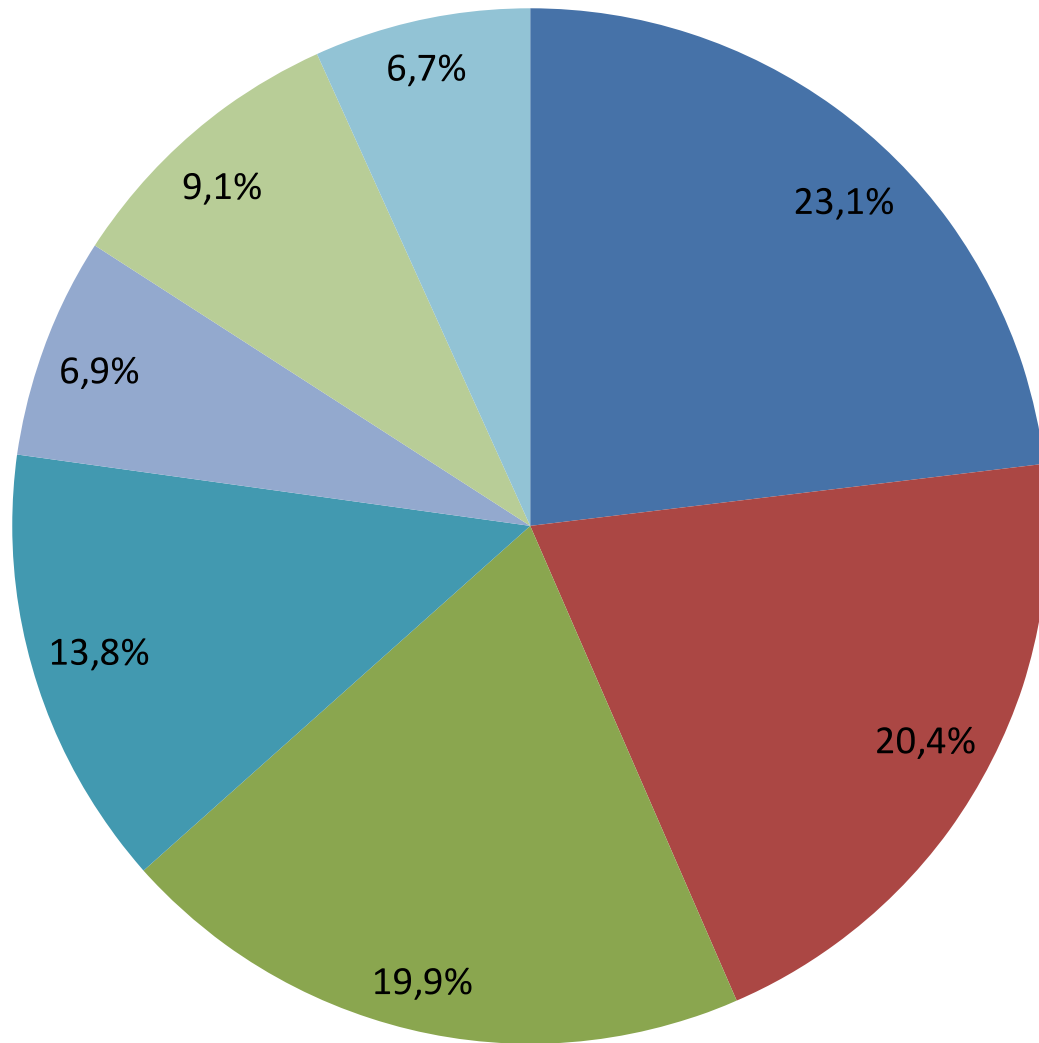

- Sarcoma NOS
- Fibrosarcoma
- Liposarcoma
- Uterine Leiomyosarcoma
- Non-uterine leiomyosarcoma
- Rhabdomyosarcoma
- Complex Neoplasia
- Phylloides-Tumor
- Angiosarcoma
- GIST
- Others

## Limbs, Women

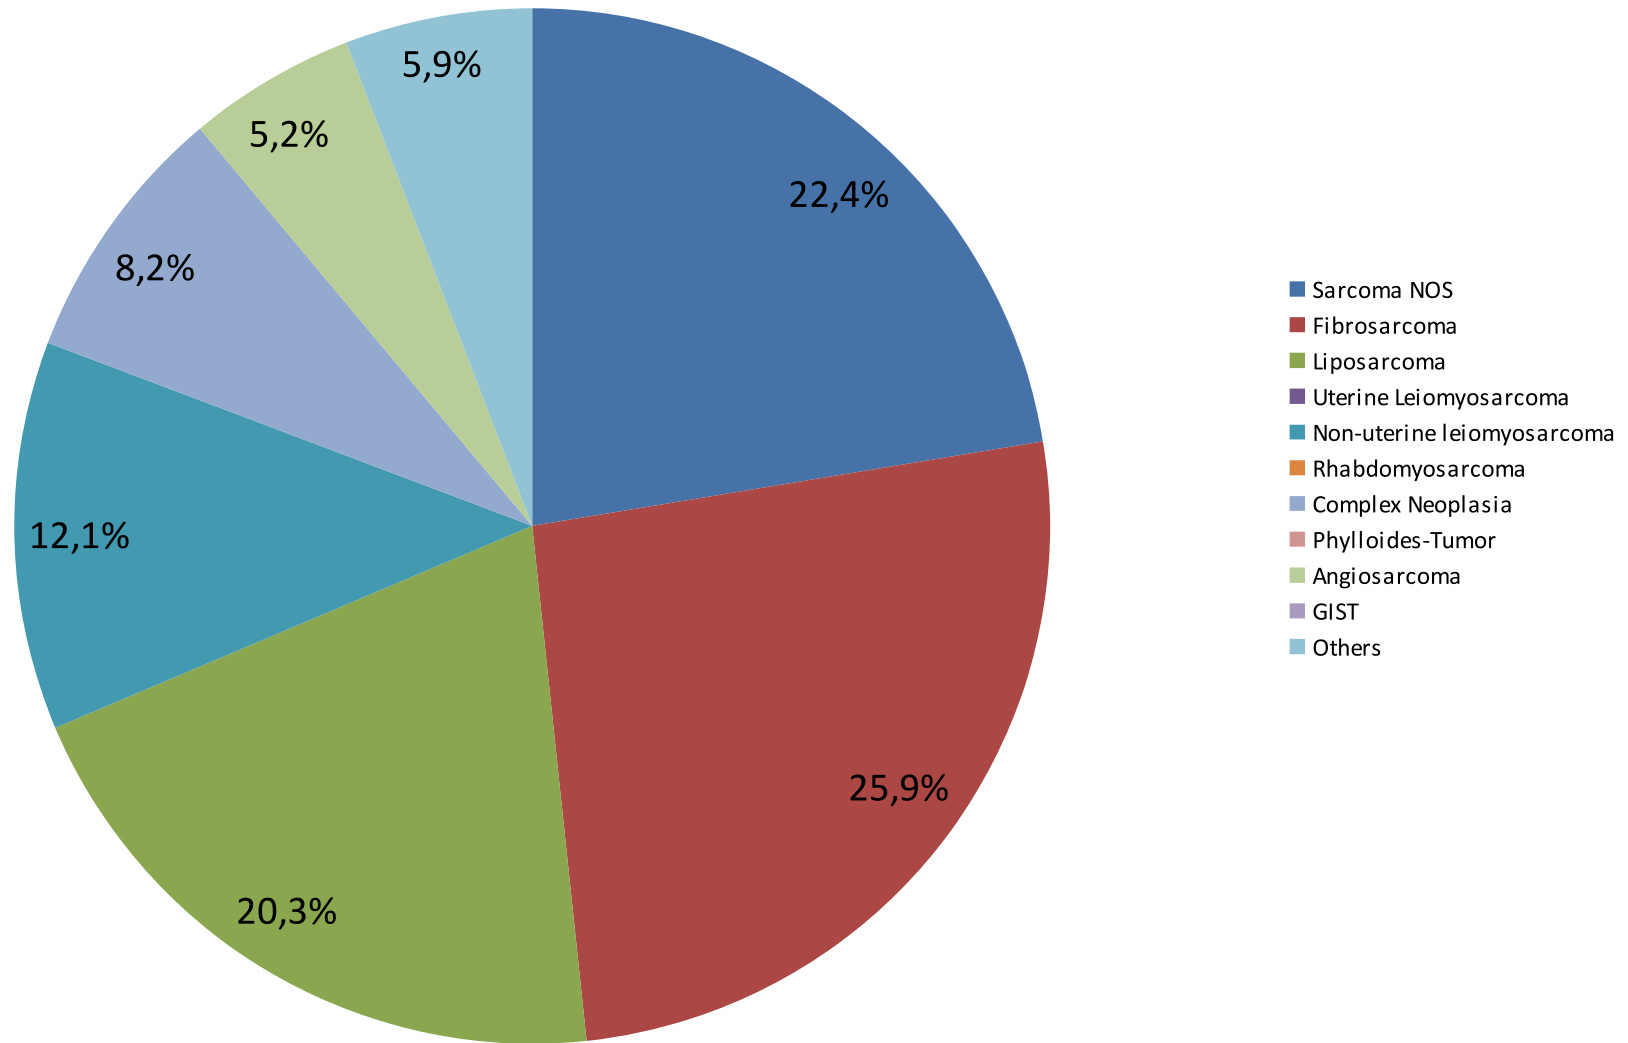

## Trunk, Men

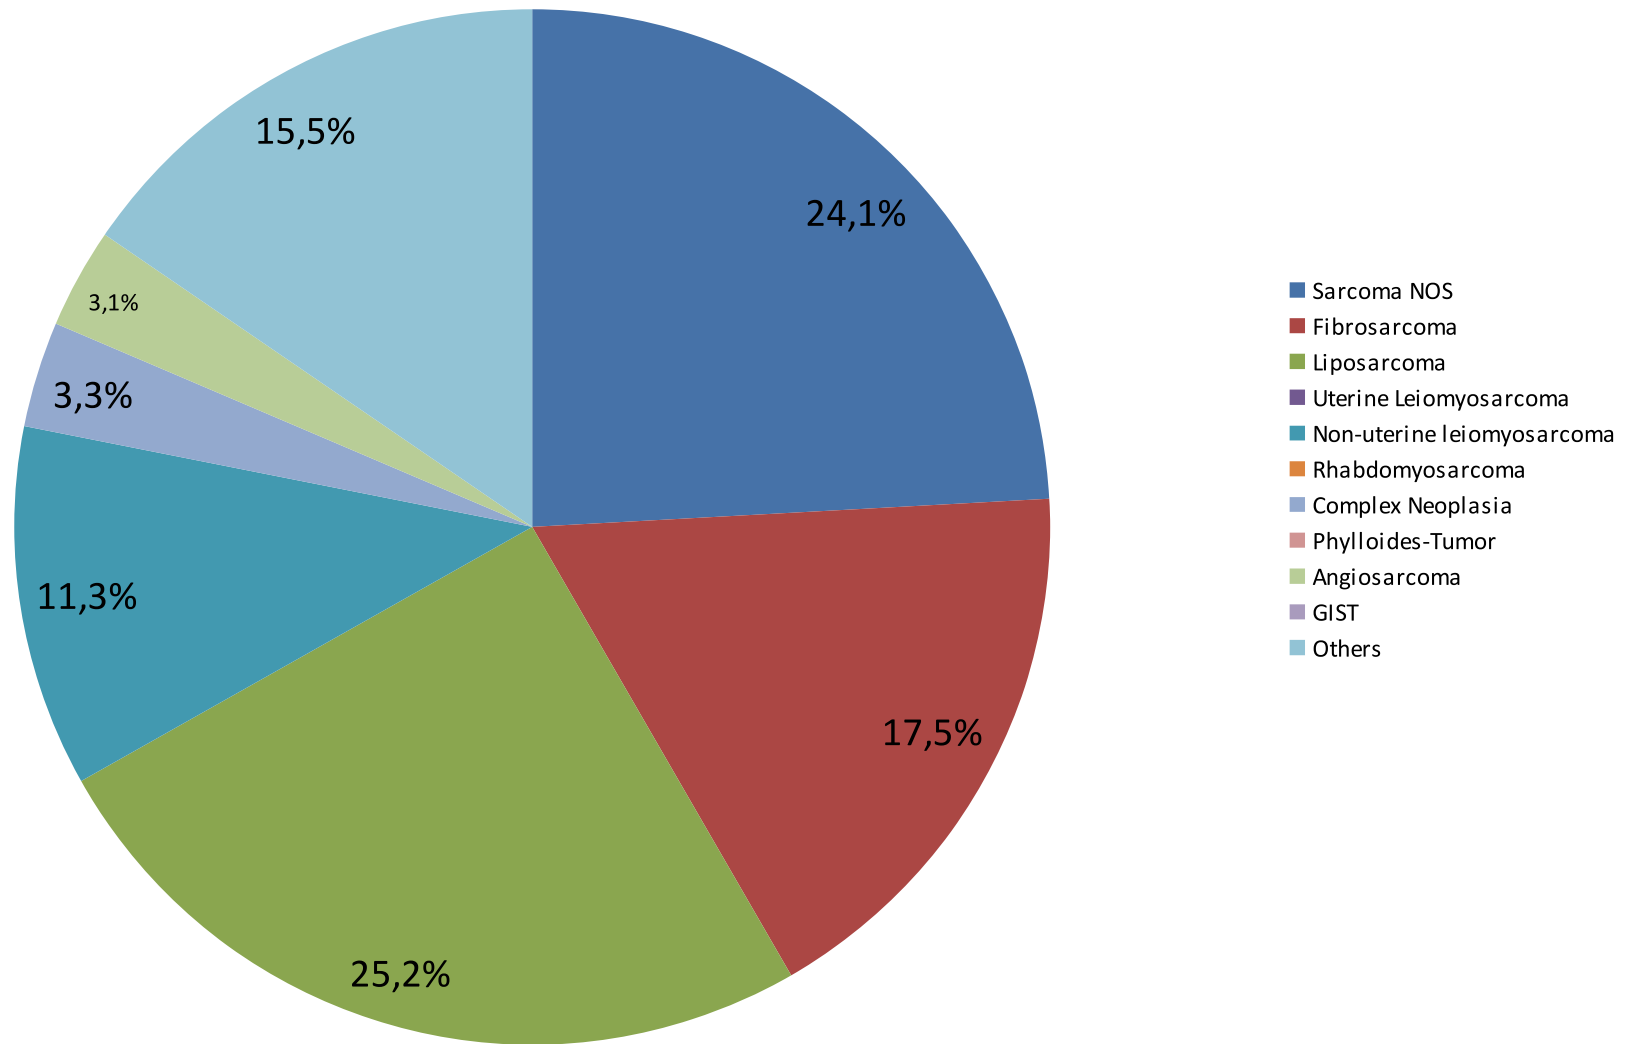

## Trunk, Women

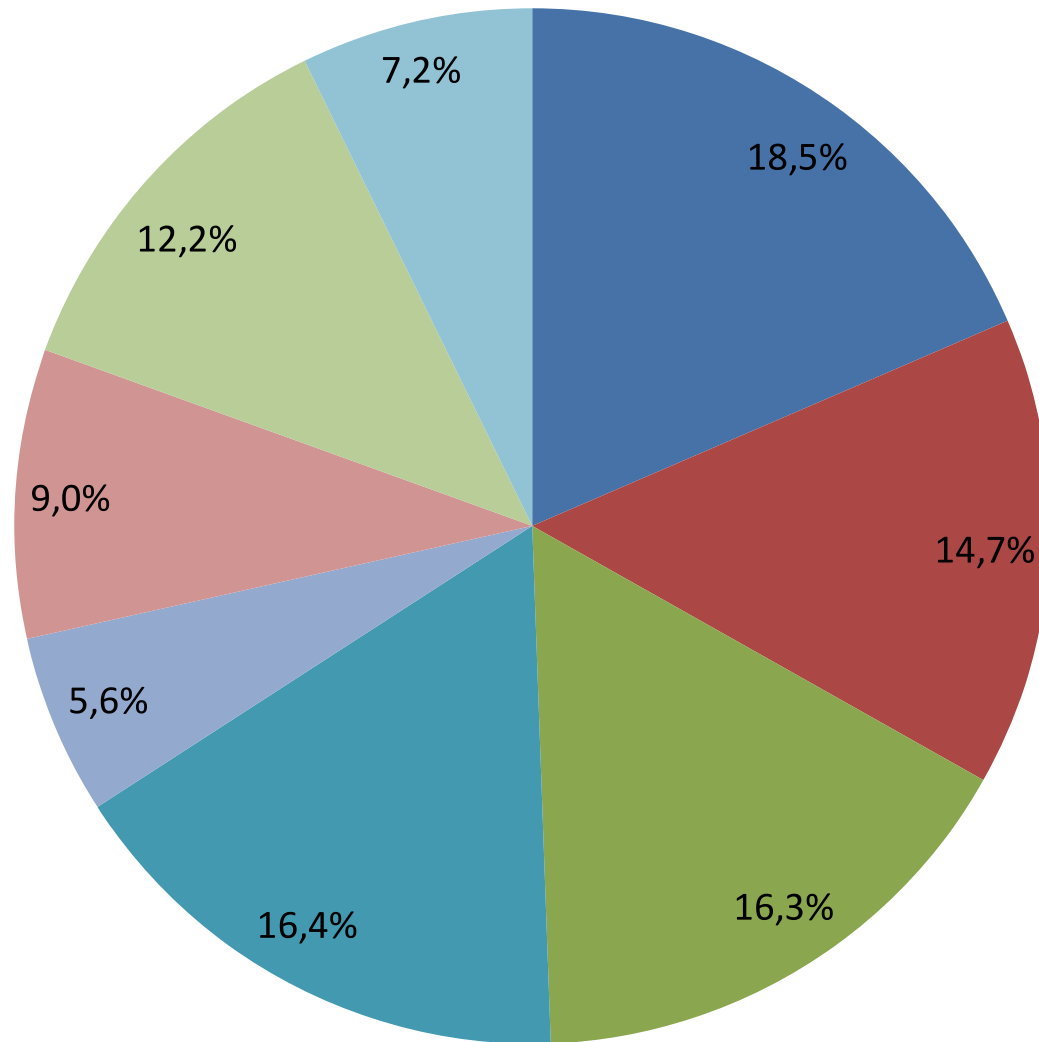

- Sarcoma NOS
- Fibrosarcoma
- Liposarcoma
- Uterine Leiomyosarcoma
- Non-uterine leiomyosarcoma
- Rhabdomyosarcoma
- Complex Neoplasia
- Phylloides-Tumor
- Angiosarcoma
- GIST
- Others



## Thorax, Men

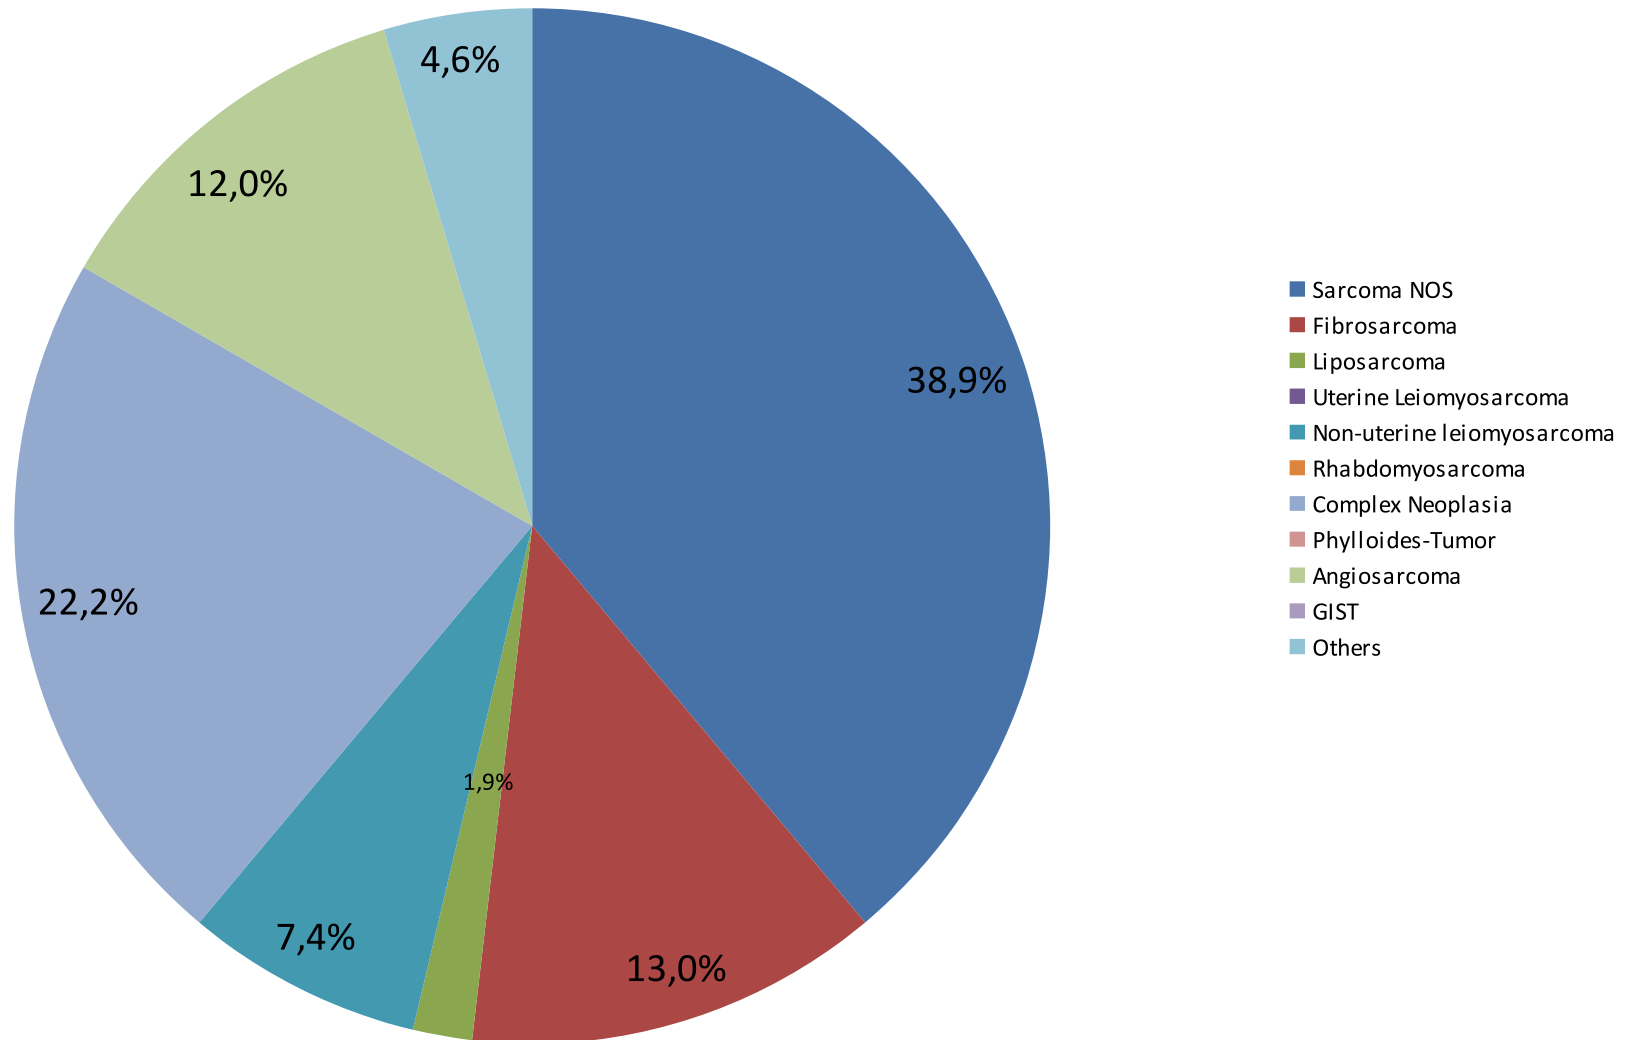

# Thorax, Women

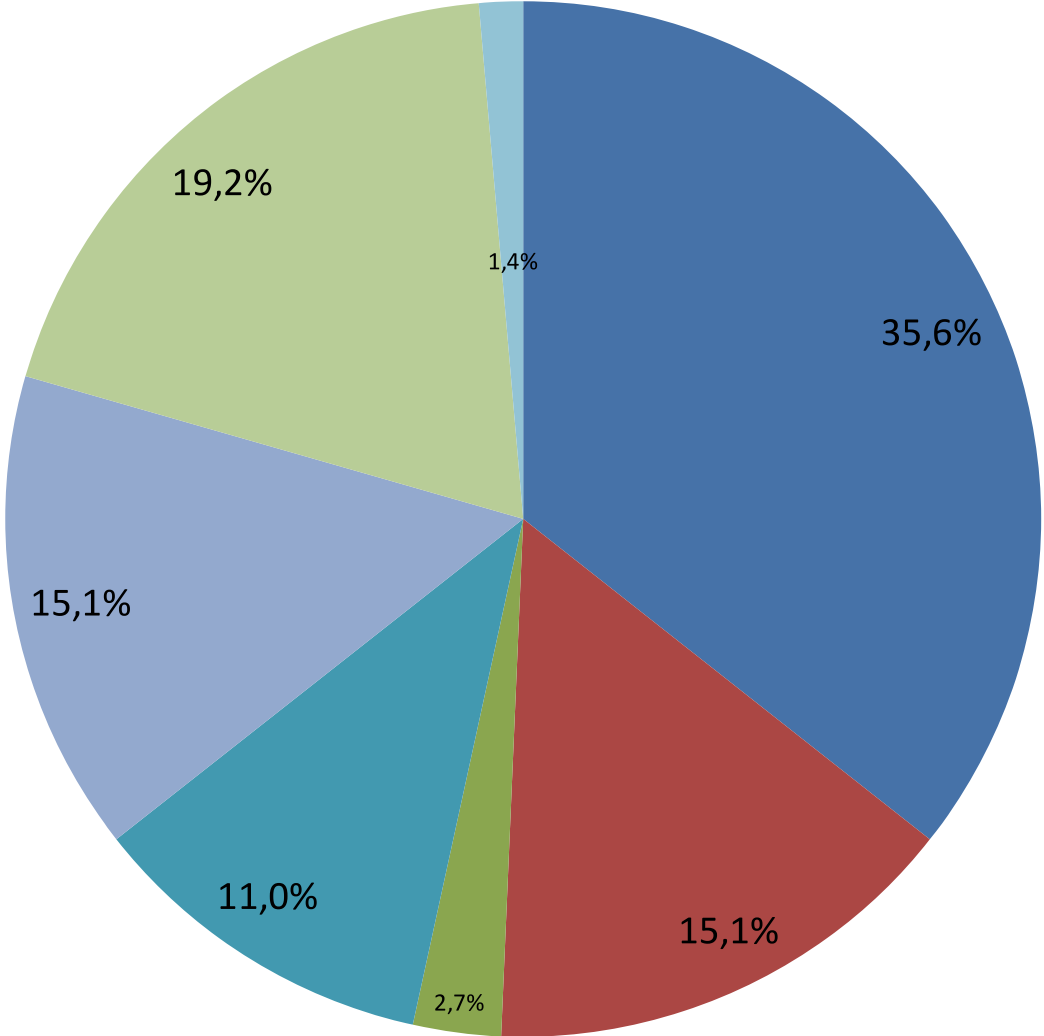

- Sarcoma NOS
- Fibrosarcoma
- Liposarcoma
- Uterine Leiomyosarcoma
- Non-uterine leiomyosarcoma
- Rhabdomyosarcoma
- Complex Neoplasia
- Phylloides-Tumor
- Angiosarcoma
- GIST
- Others

## Abdomen, Men

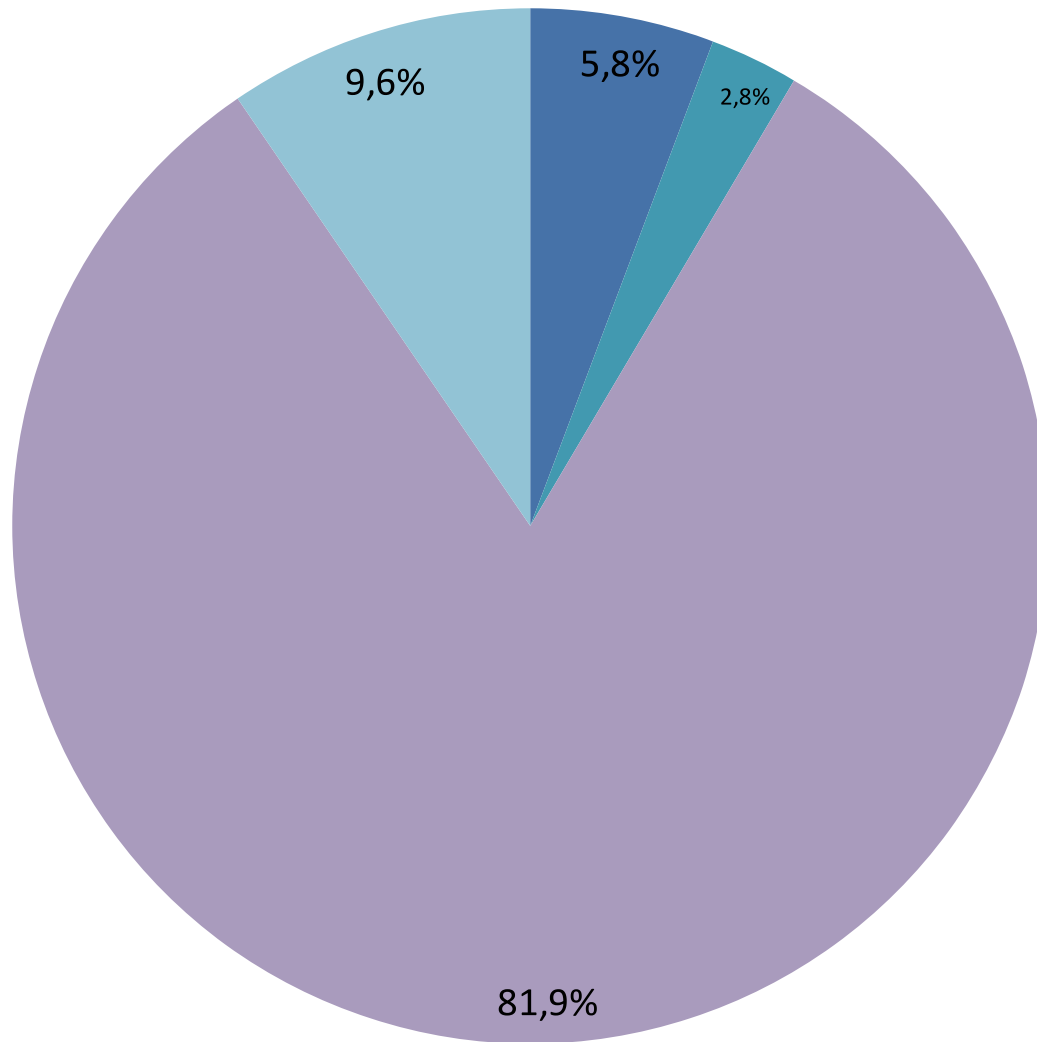

- Sarcoma NOS
- Fibrosarcoma
- Liposarcoma
- Uterine Leiomyosarcoma
- Non-uterine leiomyosarcoma
- Rhabdomyosarcoma
- Complex Neoplasia
- Phylloides-Tumor
- Angiosarcoma
- GIST
- Others

## Abdomen, Women

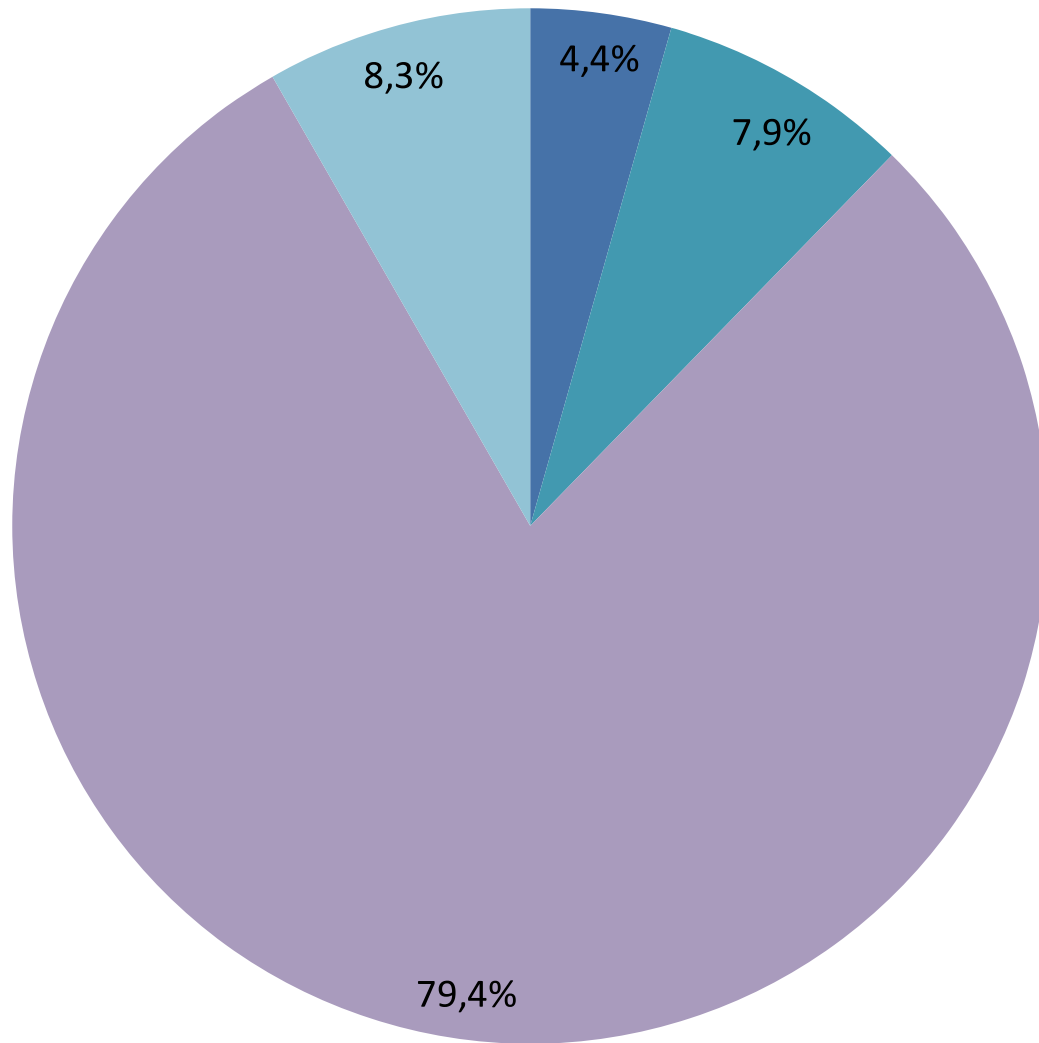

- Sarcoma NOS
- Fibrosarcoma
- Liposarcoma
- Uterine Leiomyosarcoma
- Non-uterine leiomyosarcoma
- Rhabdomyosarcoma
- Complex Neoplasia
- Phylloides-Tumor
- Angiosarcoma
- GIST
- Others

## Pelvis, Men

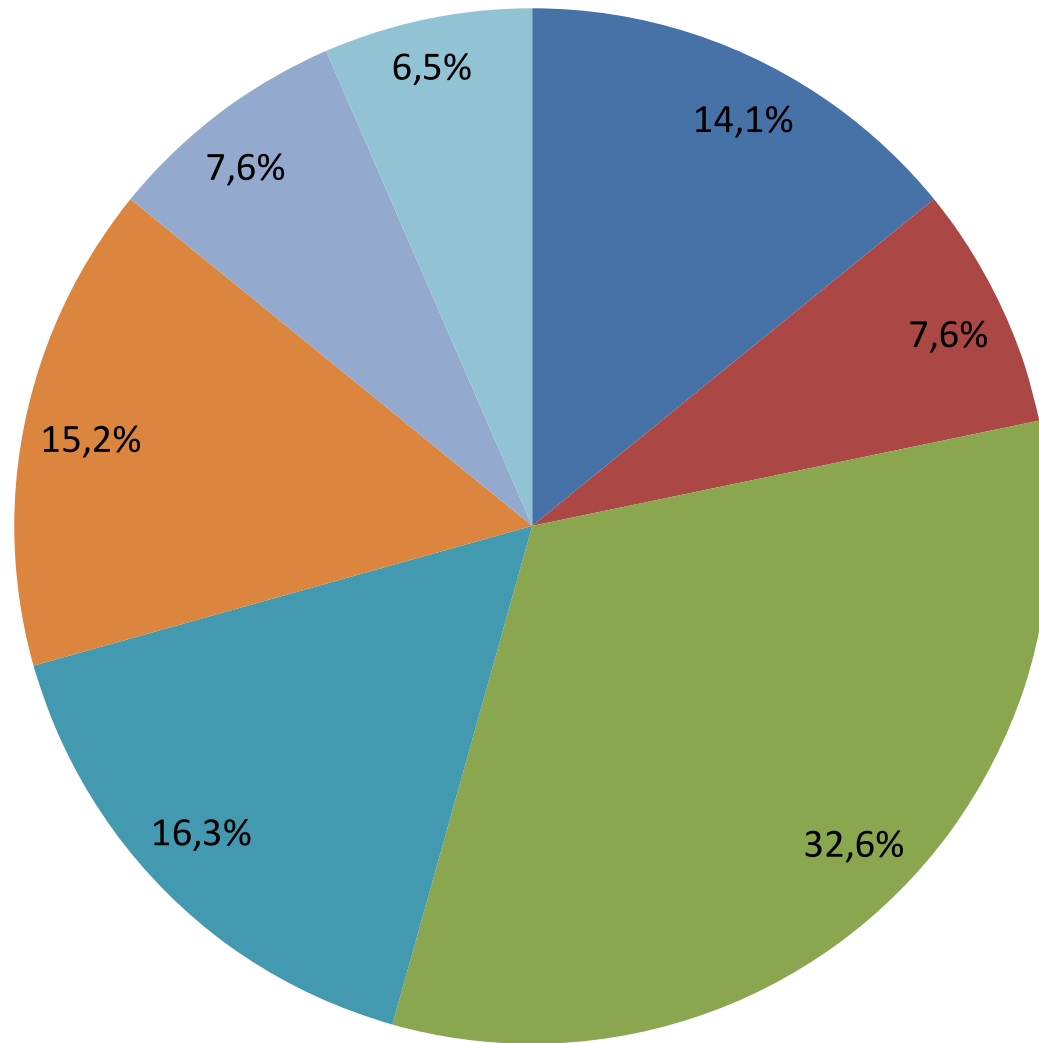

- Sarcoma NOS
- Fibrosarcoma
- Liposarcoma
- Uterine Leiomyosarcoma
- Non-uterine leiomyosarcoma
- Rhabdomyosarcoma
- Complex Neoplasia
- Phylloides-Tumor
- Angiosarcoma
- GIST
- Others

## Pelvis, Women

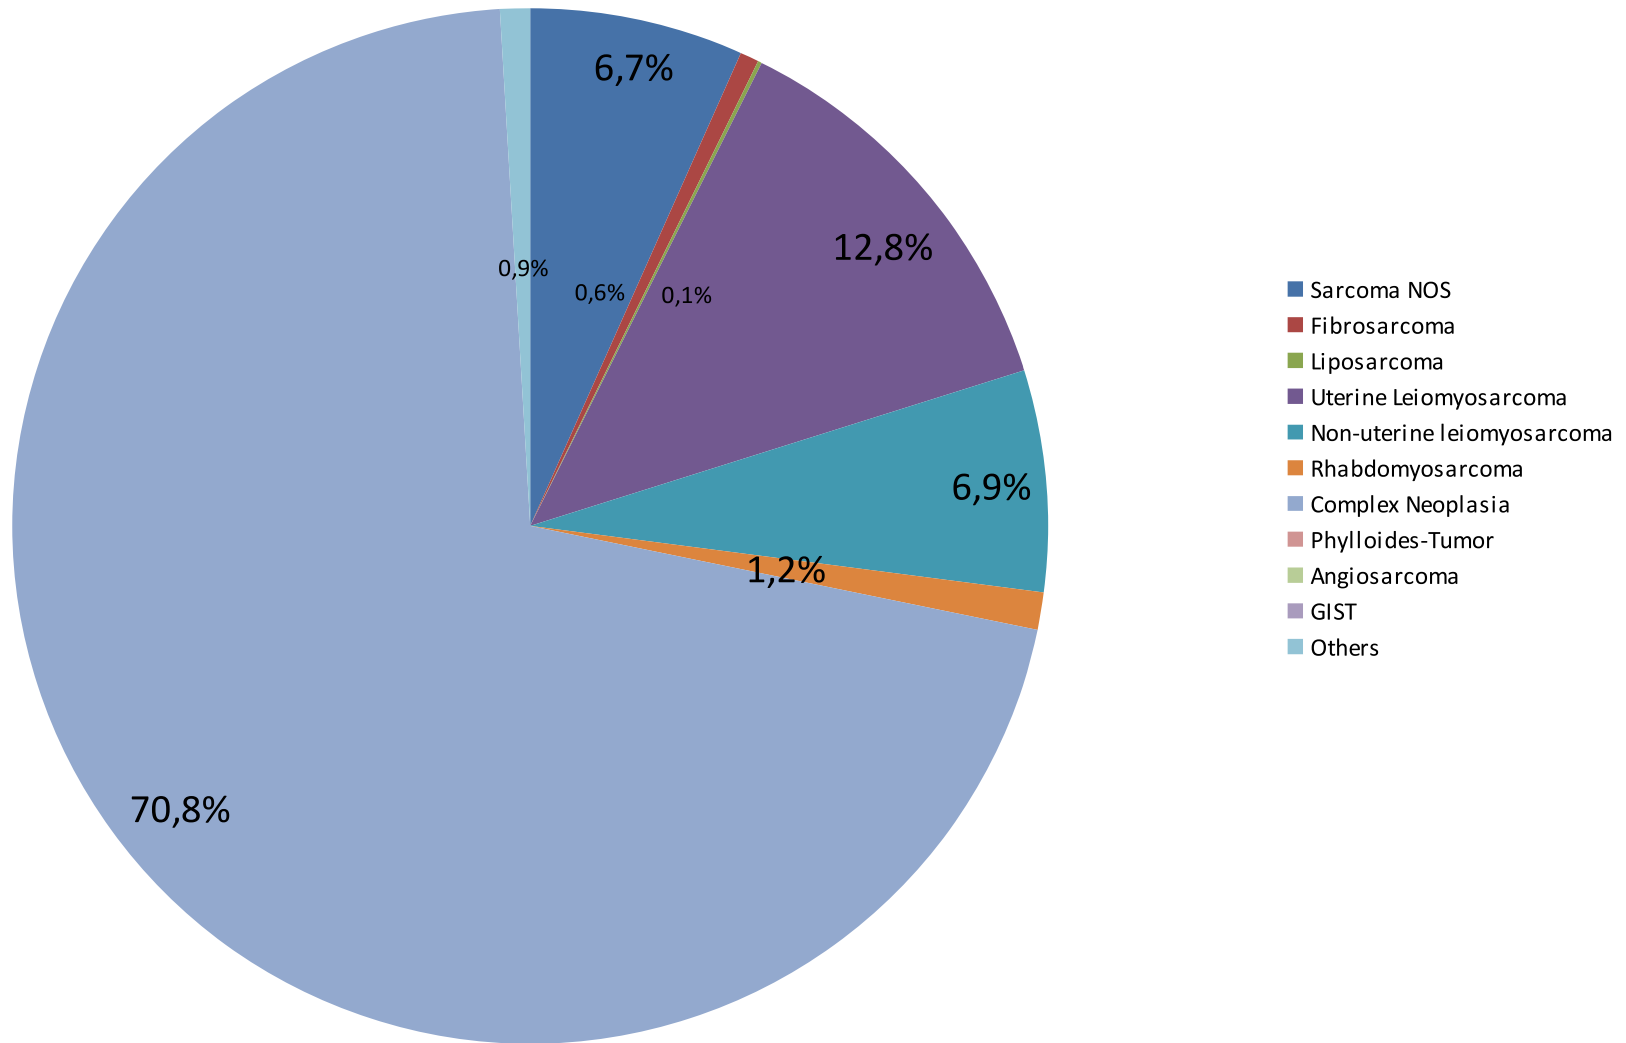

Supplement: MOESM3 [file 15459740]
